# Supplementary material for: A carboxylesterase-activatable near-infrared phototheranostic probe for tumor fluorescence imaging and photodynamic therapy
Source: Royal Society of Chemistry journal article supplement (doi:10.1039/d2ra06929f), 2022-01-01
Supplement: d2ra06929f1.pdf [file d2ra06929f1.pdf]

## Electronic Supplementary Information for

# A carboxylesterase-activatable near-infrared phototheranostic probe for tumor fluorescence imaging and photodynamic therapy

Lihong Li<sup>\*abc</sup>, Qi Zhang<sup>ac</sup>, Jiaojiao Li<sup>ac</sup>, Yafei Tian<sup>ac</sup>, Jinyao Li<sup>ac</sup>, Wen Liu<sup>bc</sup> and Haipeng Diao<sup>\*abc</sup>

<sup>a</sup> Department of Biochemistry and Molecular Biology, Shanxi Medical University, Taiyuan 030001, PR China

<sup>b</sup> Key Laboratory of Cellular Physiology (Shanxi Medical University), Ministry of Education, PR China

<sup>c</sup> College of Basic Medical Sciences, Shanxi Medical University, Taiyuan 030001, PR China  
E-mail: lilh@sxmu.edu.cn; diaohp@sxmu.edu.cn

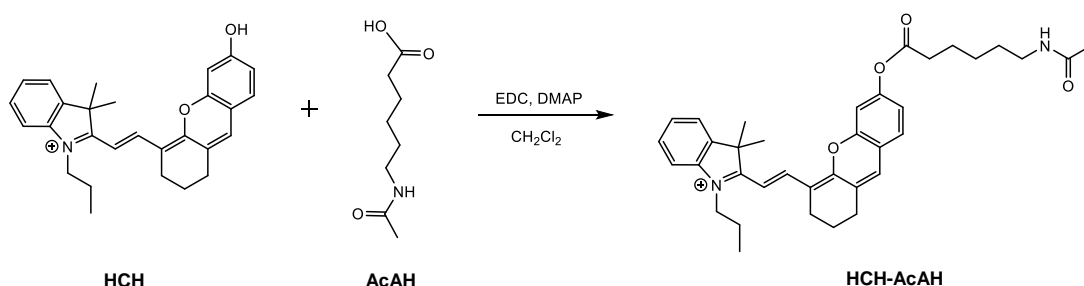

**Scheme S1.** The synthesis route of HCH-AcAH.

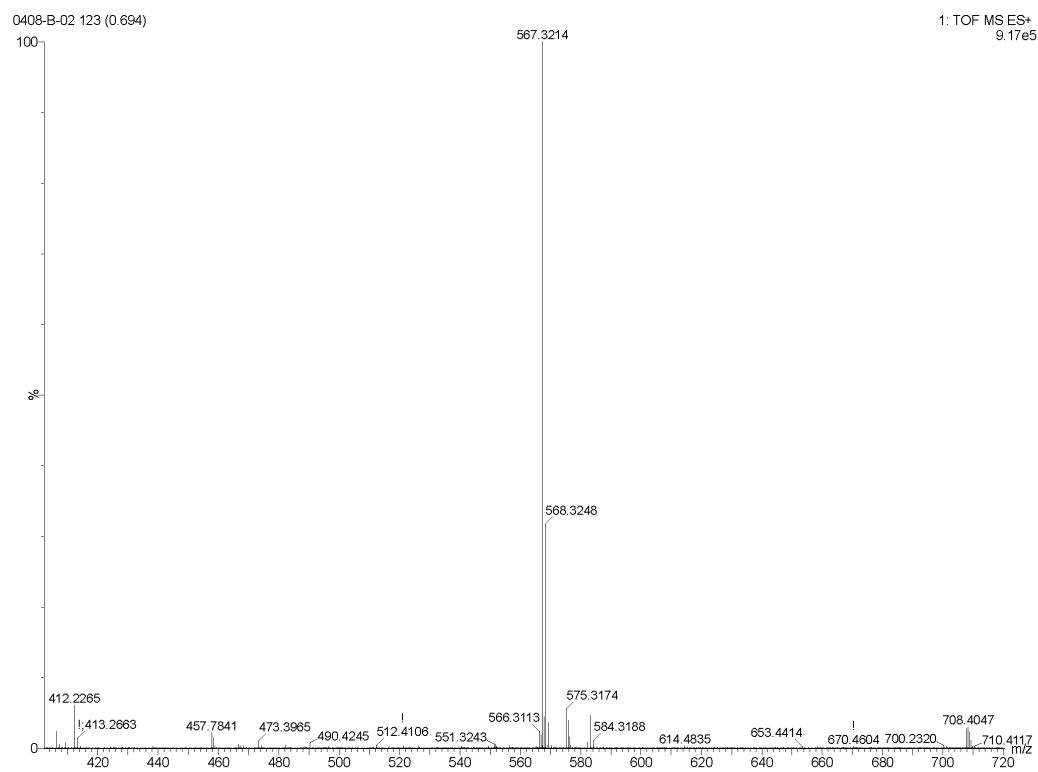

**Fig. S1.** The HR-ESI-MS of HCH-AcAH.

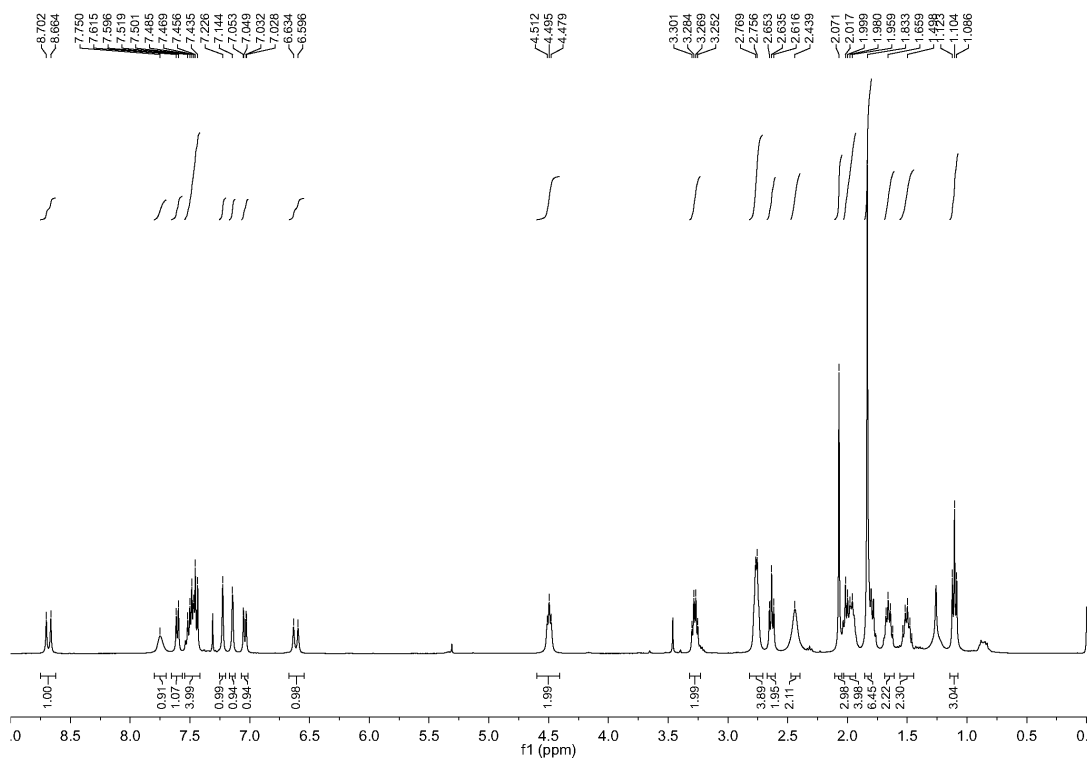

**Fig. S2.**  $^1\text{H}$  NMR of HCH-AcAH (400 MHz, 298 K,  $\text{CDCl}_3$ ).

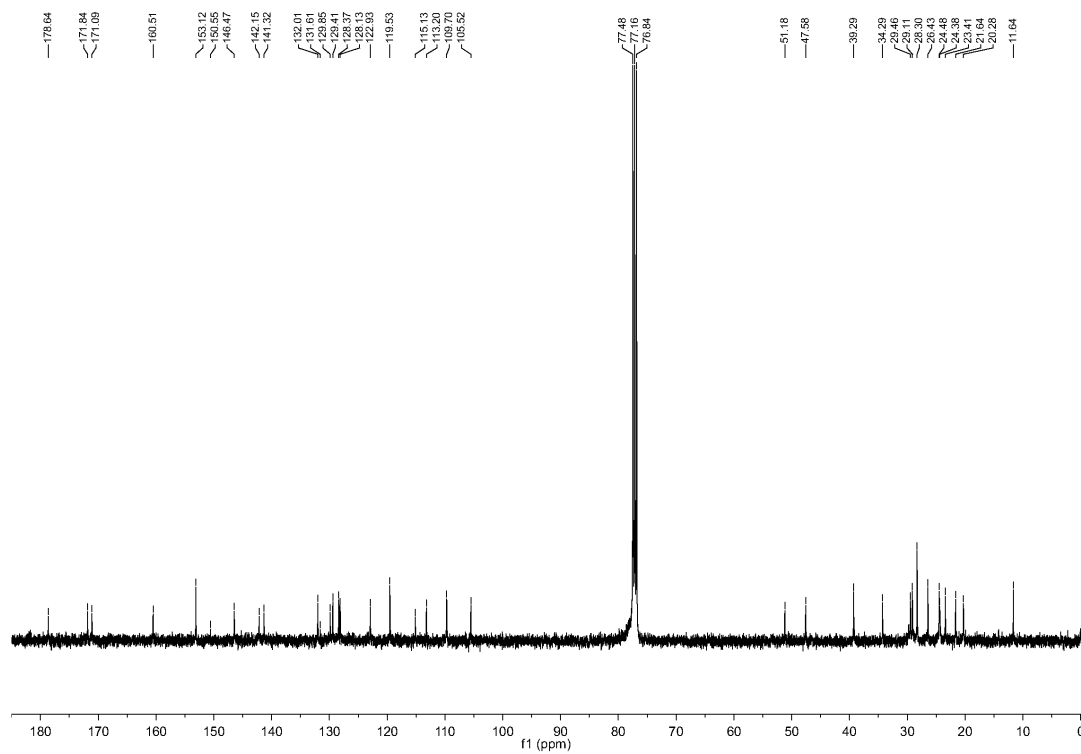

**Fig. S3.**  $^{13}\text{C}$  NMR of HCH-AcAH (100 MHz, 298 K,  $\text{CDCl}_3$ ).

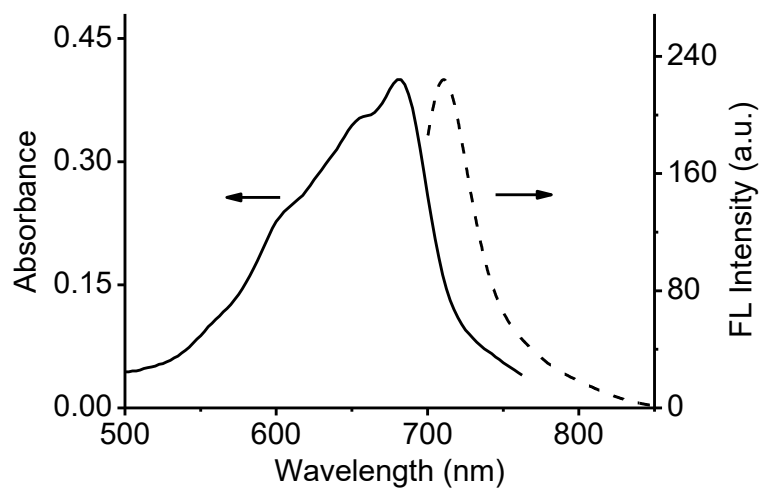

**Fig. S4.** The absorption and fluorescence spectra of the fluorophore HCH.

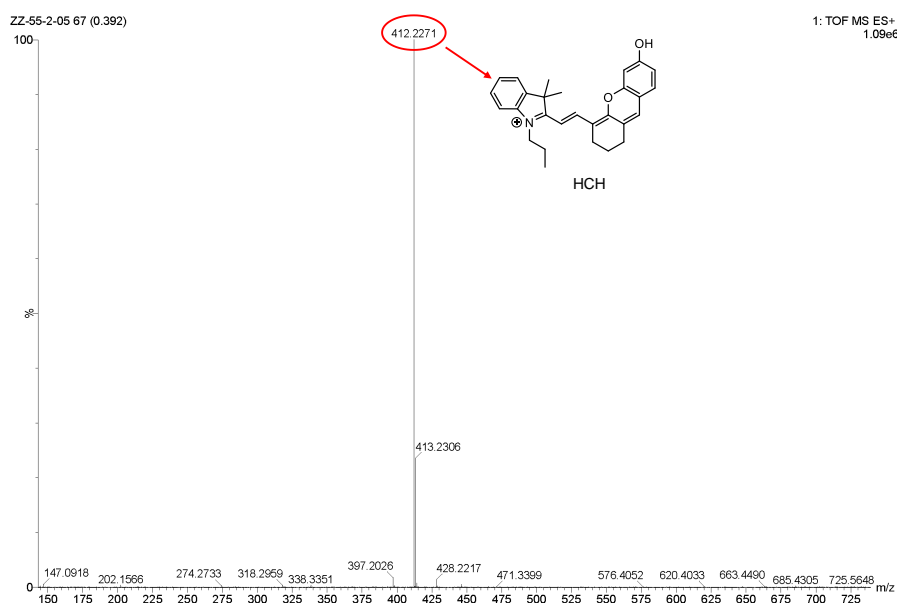

**Fig. S5.** The HR-ESI-MS of the reaction solution of HCH-AcAH with CES.

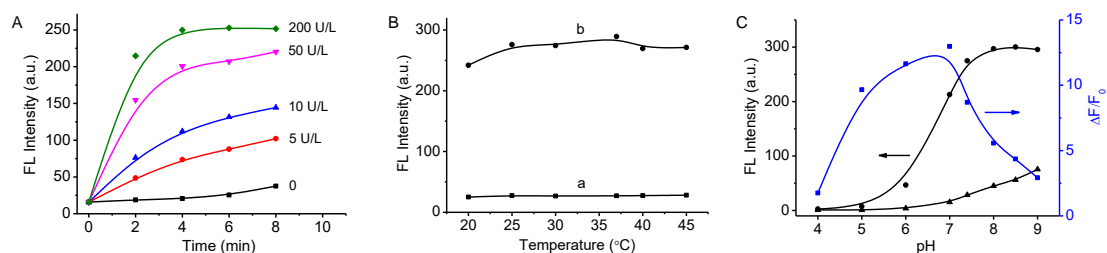

**Fig. S6.** The effects of reaction time (A), temperature (B), and pH (C) on the reaction system of HCH-AcAH (10  $\mu\text{M}$ ) and CES.  $\lambda_{\text{ex/em}} = 680/710 \text{ nm}$ .

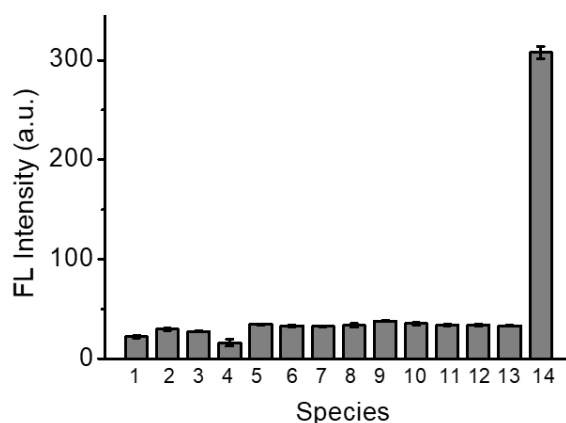

**Fig. S7.** Fluorescence responses of HCH-AcAH (10  $\mu\text{M}$ ) to various species. (1) blank; (2)  $\text{CaCl}_2$  (1 mM); (3)  $\text{FeCl}_3$  (1 mM); (4)  $\text{CuSO}_4$  (1 mM); (5)  $\text{MgCl}_2$  (1 mM); (6) cysteine (100  $\mu\text{M}$ ); (7) tyrosine (100  $\mu\text{M}$ ); (8) proline (100  $\mu\text{M}$ ); (9) methionine (100  $\mu\text{M}$ ); (10) ascorbic acid (100  $\mu\text{M}$ ); (11) glutathione (1 mM); (12) nitroreductase (1  $\mu\text{g/mL}$ ); (13) hyaluronidase (1  $\mu\text{g/mL}$ ); (14) CES (200 U/L).  $\lambda_{\text{ex/em}} = 680/710 \text{ nm}$ .

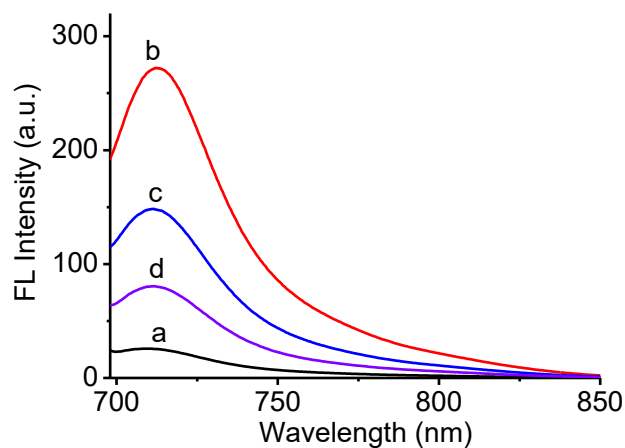

**Fig. S8.** Effects of triphenyl phosphate (TPP, an inhibitor of CES) on the fluorescence of the reaction system. (a) HCH-AcAH (10  $\mu\text{M}$ ); (b) system (a) + CES (200 U/L); (c) system (b) + TPP (100 nM); (d) system (b) + TPP (500 nM).  $\lambda_{\text{ex}} = 680 \text{ nm}$ .

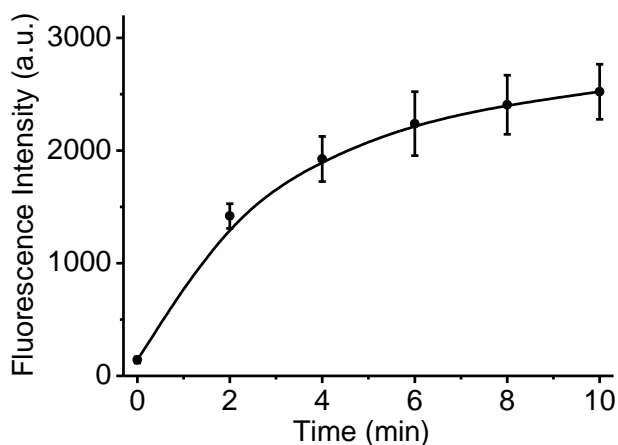

**Fig. S9.** Fluorescence changes of DCFH-DA in HCH (1  $\mu\text{M}$ ) upon 660 nm laser (0.25  $\text{W}/\text{cm}^2$ ) for different irradiation time (0-10 min).  $\lambda_{\text{ex/em}} = 485/525 \text{ nm}$ .

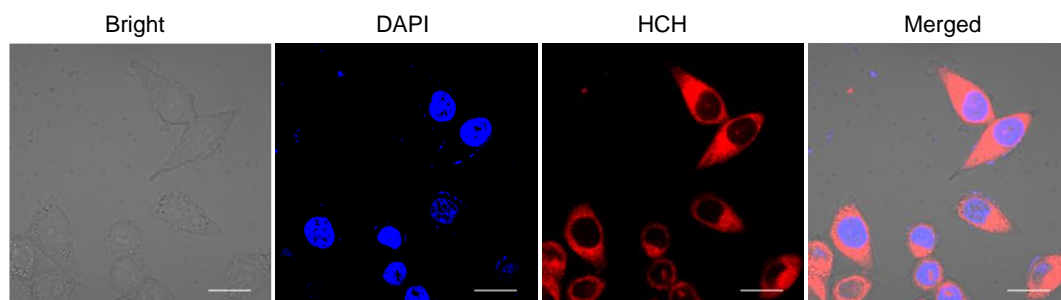

**Fig. S10.** Fluorescence images of HeLa cells incubated with HCH (10  $\mu\text{M}$ ) for 10 min. The nucleus was stained with DAPI. Scale bar, 20  $\mu\text{m}$ .

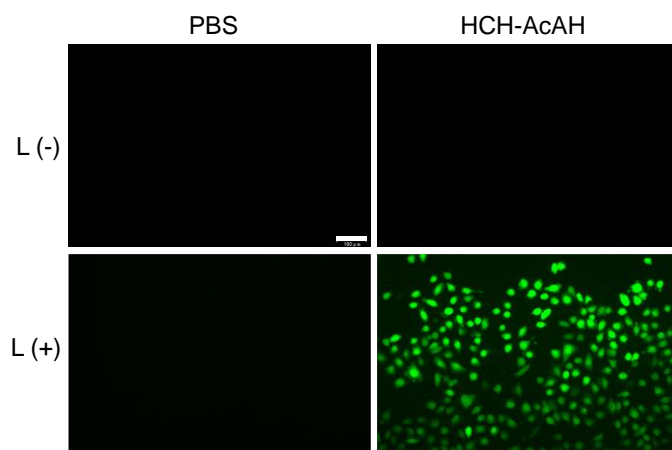

**Fig. S11.** Fluorescence images of HeLa cells treated with DCFH-DA after various treatments. Scale bar, 100  $\mu\text{m}$ .

**Table S1.** Comparison of HCH-AcAH with other reported fluorescent probes for CES

| Types             | $\lambda_{\text{ex}}/\lambda_{\text{em}}$ | Detection limit | Biological application           | Literature                                                                |
|-------------------|-------------------------------------------|-----------------|----------------------------------|---------------------------------------------------------------------------|
| Photo-theranostic | 680/710 nm                                | 0.712 U/L       | Cell imaging and PDT             | This work                                                                 |
| Photo-theranostic | 445/572 nm                                | 0.0238 U/L      | Tumor imaging and PDT in vivo    | Zhuang <i>et al.</i> , <i>CCS Chem.</i> , 2021, <b>3</b> , 1964           |
| Fluorescent       | 550/585 nm                                | 0.086 U/L       | Cell imaging                     | Zhang <i>et al.</i> , <i>Analyst</i> , 2012, <b>127</b> , 716             |
| Fluorescent       | 670/706 nm                                | 3.4 U/L         | Cell imaging                     | Li <i>et al.</i> , <i>RSC Adv.</i> , 2019, <b>9</b> , 40689               |
| Fluorescent       | 495/655 nm                                | 0.287 U/L       | Cell and mice imaging            | Dong <i>et al.</i> , <i>Dyes Pigments</i> , 2022, <b>205</b> , 110549     |
| Fluorescent       | 520/575 nm                                | 0.12 U/L        | Cell imaging                     | Zhou <i>et al.</i> , <i>J. Mater. Chem. B</i> , 2019, <b>7</b> , 2989     |
| Fluorescent       | 670/720 nm                                | 3.46 nM         | Cell and mice imaging            | Shu <i>et al.</i> , <i>Spectrochim Acta A</i> , 2022, <b>281</b> , 121529 |
| Fluorescent       | 690/710 nm                                | 0.82 U/L        | Cell, zebrafish and mice imaging | Wang <i>et al.</i> , <i>ACS Sens.</i> , 2020, <b>5</b> , 3264             |
| Fluorescent       | 437/650 nm                                | 5 U/L           | Cell imaging                     | Peng <i>et al.</i> , <i>Anal. Chem.</i> , 2017, <b>89</b> , 3162          |

|             |            |           |                                  |                                                                                   |
|-------------|------------|-----------|----------------------------------|-----------------------------------------------------------------------------------|
| Fluorescent | 490/551 nm | 95.1 mU/L | Cell imaging                     | Wang <i>et al.</i> , <i>ACS Appl. Mater. Interfaces</i> , 2018, <b>10</b> , 31088 |
| Fluorescent | 520/560 nm | 390 U/L   | Cell imaging                     | Liu <i>et al.</i> , <i>Biosens. Bioelectron.</i> , 2022, <b>211</b> , 114392.     |
| Fluorescent | 590/640 nm | 17 ng/mL  | Cell, zebrafish and mice imaging | Liu <i>et al.</i> , <i>Anal. Chim. Acta</i> , 2022, <b>1221</b> , 340126          |
| Fluorescent | 555/595 nm | 60.7 mU/L | Cell imaging                     | Sun <i>et al.</i> , <i>Chinese Chem. Lett.</i> , 2022, <b>33</b> , 4229           |

---
